# Supplementary material
Source: PubMed Central journal article supplement (PMC10312659)
Supplement: NIHMS1865722-supplement-1865722_RS.pdf [file NIHMS1865722-supplement-1865722_RS.pdf]

## Reporting Summary

Nature Portfolio wishes to improve the reproducibility of the work that we publish. This form provides structure for consistency and transparency in reporting. For further information on Nature Portfolio policies, see our [Editorial Policies](#) and the [Editorial Policy Checklist](#).

### Statistics

For all statistical analyses, confirm that the following items are present in the figure legend, table legend, main text, or Methods section.

n/a Confirmed

- The exact sample size ( $n$ ) for each experimental group/condition, given as a discrete number and unit of measurement
- A statement on whether measurements were taken from distinct samples or whether the same sample was measured repeatedly
- The statistical test(s) used AND whether they are one- or two-sided  
*Only common tests should be described solely by name; describe more complex techniques in the Methods section.*
- A description of all covariates tested
- A description of any assumptions or corrections, such as tests of normality and adjustment for multiple comparisons
- A full description of the statistical parameters including central tendency (e.g. means) or other basic estimates (e.g. regression coefficient) AND variation (e.g. standard deviation) or associated estimates of uncertainty (e.g. confidence intervals)
- For null hypothesis testing, the test statistic (e.g.  $F$ ,  $t$ ,  $r$ ) with confidence intervals, effect sizes, degrees of freedom and  $P$  value noted  
*Give  $P$  values as exact values whenever suitable.*
- For Bayesian analysis, information on the choice of priors and Markov chain Monte Carlo settings
- For hierarchical and complex designs, identification of the appropriate level for tests and full reporting of outcomes
- Estimates of effect sizes (e.g. Cohen's  $d$ , Pearson's  $r$ ), indicating how they were calculated

*Our web collection on [statistics for biologists](#) contains articles on many of the points above.*

### Software and code

Policy information about [availability of computer code](#)

Data collection

Data analysis

For manuscripts utilizing custom algorithms or software that are central to the research but not yet described in published literature, software must be made available to editors and reviewers. We strongly encourage code deposition in a community repository (e.g. GitHub). See the Nature Portfolio [guidelines for submitting code & software](#) for further information.

### Data

Policy information about [availability of data](#)

All manuscripts must include a [data availability statement](#). This statement should provide the following information, where applicable:

- Accession codes, unique identifiers, or web links for publicly available datasets
- A description of any restrictions on data availability
- For clinical datasets or third party data, please ensure that the statement adheres to our [policy](#)

all data obtained in this study have been deposited as noted in the manuscript. all data obtained in this study have been deposited as noted in the manuscript. The atomic coordinates for six structures of pks13 have been deposited in the Protein Data Bank with the accession codes 7UK4, 8CUY, 8CV1, 8CUZ, 8CV0. The corresponding maps have been deposited in the Electron Microscopy Data Bank with the accession codes EMD-26574, EMD-27002, EMD27005, EMD-27003,

EMD-27004. Proteomics data have been deposited to the ProteomeXchange Consortium with the dataset identifier PXD033471. Files containing the input data, scripts, and output results for integrative modeling are freely available at <https://github.com/integrativemodeling/Pks13>. The details about the approach are given in Table S4.

## Human research participants

Policy information about [studies involving human research participants and Sex and Gender in Research](#).

|                             |                |
|-----------------------------|----------------|
| Reporting on sex and gender | Not Applicable |
| Population characteristics  | Not Applicable |
| Recruitment                 | Not Applicable |
| Ethics oversight            | Not Applicable |

Note that full information on the approval of the study protocol must also be provided in the manuscript.

## Field-specific reporting

Please select the one below that is the best fit for your research. If you are not sure, read the appropriate sections before making your selection.

Life sciences  Behavioural & social sciences  Ecological, evolutionary & environmental sciences

For a reference copy of the document with all sections, see [nature.com/documents/nr-reporting-summary-flat.pdf](https://nature.com/documents/nr-reporting-summary-flat.pdf)

## Life sciences study design

All studies must disclose on these points even when the disclosure is negative.

|                 |                                                                                                                                                                                                                                                                                                                                                                                                                                                                                                                                                                                                                                |
|-----------------|--------------------------------------------------------------------------------------------------------------------------------------------------------------------------------------------------------------------------------------------------------------------------------------------------------------------------------------------------------------------------------------------------------------------------------------------------------------------------------------------------------------------------------------------------------------------------------------------------------------------------------|
| Sample size     | Several millions of particle images were combined into the CryoEM analysis. They were classified into the different states whose structures are reported.                                                                                                                                                                                                                                                                                                                                                                                                                                                                      |
| Data exclusions | As in cryoEM analysis, many thousands of images are classified according to their quality. Those images that do not have suitable quality, or do not fit the classes are excluded from further averaging. As to the chemical cross linking, we excluded large molecular weight species that were from potential aggregates of multiple molecules, cross linked residues that are too far apart for within a dimeric Pks13 were excluded since they were presumed to arise from multimeric assemblies of PKS molecules and not relevant to intramolecular dynamics. (detailed in Methods, and Fig S9, S10, and Extended Fig 10. |
| Replication     | he only replication was that the crosslinking experiment was done twice but at two different temperatures, giving non-equivalent data that were not compared statistically. see Supp Fig 9. caption                                                                                                                                                                                                                                                                                                                                                                                                                            |
| Randomization   | 4,400,000 Images of Single particles for the di-domain structures (KS-AT) and 1,200,000 for each of the other 5 structures, were classified according to standard procedures in cryoEM imaging by classification into separate classes that are gleaned from 100% of the particle image sets.                                                                                                                                                                                                                                                                                                                                  |
| Blinding        | There was no blinding. images of particles were picked according to classification into classes as is the standard in cryoEM imaging                                                                                                                                                                                                                                                                                                                                                                                                                                                                                           |

## Reporting for specific materials, systems and methods

We require information from authors about some types of materials, experimental systems and methods used in many studies. Here, indicate whether each material, system or method listed is relevant to your study. If you are not sure if a list item applies to your research, read the appropriate section before selecting a response.

### Materials & experimental systems

| n/a                                 | Involved in the study                                  |
|-------------------------------------|--------------------------------------------------------|
| <input checked="" type="checkbox"/> | <input type="checkbox"/> Antibodies                    |
| <input checked="" type="checkbox"/> | <input type="checkbox"/> Eukaryotic cell lines         |
| <input checked="" type="checkbox"/> | <input type="checkbox"/> Palaeontology and archaeology |
| <input checked="" type="checkbox"/> | <input type="checkbox"/> Animals and other organisms   |
| <input checked="" type="checkbox"/> | <input type="checkbox"/> Clinical data                 |
| <input checked="" type="checkbox"/> | <input type="checkbox"/> Dual use research of concern  |

### Methods

| n/a                                 | Involved in the study                           |
|-------------------------------------|-------------------------------------------------|
| <input checked="" type="checkbox"/> | <input type="checkbox"/> ChIP-seq               |
| <input checked="" type="checkbox"/> | <input type="checkbox"/> Flow cytometry         |
| <input checked="" type="checkbox"/> | <input type="checkbox"/> MRI-based neuroimaging |
