# Supplementary material
Source: PubMed Central journal article supplement (PMC10312659)

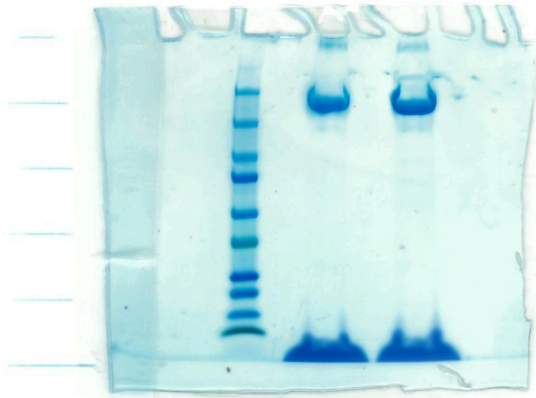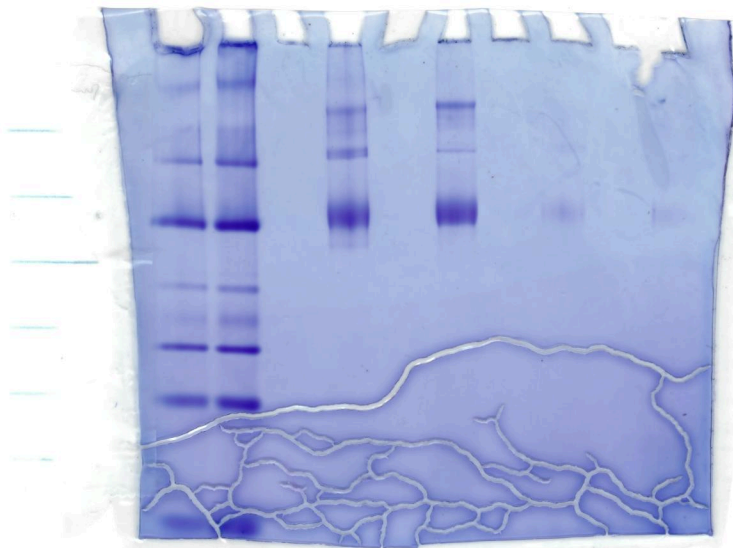

Supplement: NIHMS1865722-supplement-1865722_SD_ED_Fig_1.pdf [file NIHMS1865722-supplement-1865722_SD_ED_Fig_1.pdf]
